# Supplementary material for: Enhanced Performance of nZVI/MXene@CNTs for Rapid As(III) Removal from Aqueous Solutions
Source: MDPI journal article supplement (doi:10.3390/app12168206), 2022-08-17
Supplement: s1 [file s1]

Archive with 1 entries (1 files):
- applsci-1800888-supplementary.pdf
