# Supplementary material for: Enhanced Performance of nZVI/MXene@CNTs for Rapid As(III) Removal from Aqueous Solutions
Source: MDPI journal article supplement (doi:10.3390/app12168206), 2022-08-17
Supplement: s1 [file s1 › applsci-1800888-supplementary.pdf]

## ***Supplementary Materials***

### **S1. As(III) removal by different materials**

Ye<sup>[1]</sup> et al. used chemical modification to obtain functionalized CNTs and NMCNTs-PANI. The results showed that the maximum adsorption capacity was 14.80 mg/g at the experimental conditions of As(III) initial concentration of 10 mg/L, 25°C and t=35 min. Additionally, in this work, As(III) was mainly removed from the aqueous solution by adsorption without being changed into other less toxic compounds. Sherlala<sup>[2]</sup> et al. synthesized CMGO nanocomposite for arsenic adsorption with high specific surface area (152.38 m<sup>2</sup>/g) and excellent saturation magnetization (49.30 emu/g). And the highest adsorption capacity (45 mg/g) and removal efficiency (61%) were obtained at pH 7.3. In comparison to this study, the maximum removal could reach 333.56 mg/g at 25°C and pH=5.0, which represented a significant increase over both economically and operationally.

**Table S1** Comparison of As(III) removal performance of nZVI/MXene@CNTs and other materials

| Materials       | Experimental conditions                  | q <sub>e</sub> (mg/g) | References |
|-----------------|------------------------------------------|-----------------------|------------|
| NMCNTs-PANI     | C <sub>0</sub> =10mg/L, 25°C,<br>t=35min | 14.80                 | [1]        |
| CMGO            | 60 °C, pH=10                             | 63.31                 | [2]        |
| nZVI/MXene@CNTs | 25 °C, pH=5                              | 333.56                |            |

### **S2. Adsorption kinetics, isotherms and thermodynamics**

#### **S2.1. Adsorption kinetics**

In a 150 mL conical flask, 0.02 g of nZVI/MXene@CNTs and a 50 mL 200 mg/L As(III) solution were added, and the reaction was carried out at pH=5.0, 25 °C and 150

rpm. The As(III) content was measured at each time point, respectively. The adsorption process and mechanism of As(III) by nZVI/MXene@CNTs were determined by analytical fitting of the obtained data using pseudo-first-order and pseudo-second-order kinetic models(eq. S1 and S2).

$$\ln (q_e - q_t) = \ln q_e - k_1 t \quad (S1)$$

$$\frac{t}{q_t} = \frac{1}{k_2 q_e^2} + \frac{t}{q_e} \quad (S2)$$

Where,  $k_1$  and  $k_2$  are the pseudo-first-order and pseudo-second-order kinetic models adsorption equilibrium constants, respectively;  $q_t$  and  $q_e$  (mg/g) are the adsorption capacities of nZVI/MXene@CNTs on As(III) at a specific and equilibrium reaction time;  $t$  is the reaction time.

## S2.2. Adsorption isotherms

In a 150 mL conical flask, 0.02 g of nZVI/MXene@CNTs and the 50 mL different initial concentration of As(III) solution were added, and the reaction was carried out at pH=5.0, 25 °C and 150 rpm. The content of As(III) was measured after 120 min of reaction. The adsorption process and mechanism of As(III) by nZVI/MXene@CNTs were further demonstrated using the fitted data via Langmuir(eq. S3) and Freundlich isothermal adsorption models(eq. S4)

$$q_e = \frac{q_m C_e K_L}{1 + K_L C_e} \quad (S3)$$

$$q_e = K_F C_e^{\frac{1}{n}} \quad (S4)$$

Where,  $K_L$  and  $K_F$  are the Langmuir and Freundlich adsorption constants, respectively;  $C_e$  (mg/L) is the concentration of As(III) at equilibrium;  $q_e$  (mg/g) is the adsorption amount corresponding to  $C_e$ ; and  $q_m$  (mg/g) is the theoretical maximum adsorption amount obtained from the two adsorption isotherm models.

## S2.3. Adsorption thermodynamics

The three thermodynamic parameters, Gibbs free energy change ( $G^0$ ), entropy change ( $S^0$ ), and enthalpy change ( $H^0$ ), are determined from the fitting and analysis of

the adsorption isotherm, and then  $k_d$  and the thermodynamic parameters are calculated (Eq. S5, S6).

$$\Delta G^0 = -RT \ln k_d \quad (S5)$$

$$\ln k_d = \frac{\Delta S^0}{R} - \frac{\Delta H^0}{RT} \quad (S6)$$

Where,  $\Delta G^0$  (KJ/mol) is the Gibbs free energy change;  $R$  (8.314 J/(mol·K)) is the thermodynamic model constant;  $T$  (K) is the absolute temperature;  $k_d$  (L/g) is the thermodynamic equilibrium constant

**Table S2** The fitting parameters of pseudo-first-order and pseudo-second-order kinetic models for As(III) adsorption by nZVI/MXene@CNTs

| Temperature (°C) | Pseudo-first-order kinetic model |                            |        | Pseudo-second-order kinetic model |                       |        |
|------------------|----------------------------------|----------------------------|--------|-----------------------------------|-----------------------|--------|
|                  | $q_{cal}$ (mg/g)                 | $k_1$ (min <sup>-1</sup> ) | $R^2$  | $q_{cal}$ (mg/g)                  | $K$ (g/(mg·min))      | $R^2$  |
| 15               | 317.48                           | 0.022                      | 0.9876 | 403.58                            | $5.39 \times 10^{-5}$ | 0.9880 |
| 25               | 336.27                           | 0.030                      | 0.9922 | 408.19                            | $7.93 \times 10^{-5}$ | 0.9942 |
| 35               | 342.93                           | 0.035                      | 0.9828 | 405.96                            | $1.01 \times 10^{-4}$ | 0.9893 |

**Table S3** The fitting parameters of Langmuir and Freundlich isotherm models for As(III) adsorption by nZVI/MXene@CNTs

| Temperature (°C) | Langmuir isotherm models |            |        | Freundlich isotherm models |      |        |
|------------------|--------------------------|------------|--------|----------------------------|------|--------|
|                  | $q_m$ (mg/g)             | $b$ (L/mg) | $R^2$  | $k_f$ (mg/g)               | $n$  | $R^2$  |
| 15               | 309.19                   | 0.37       | 0.9857 | 127.19                     | 5.26 | 0.9319 |
| 25               | 336.64                   | 0.41       | 0.9771 | 146.38                     | 5.47 | 0.9267 |
| 35               | 338.06                   | 1.08       | 0.9756 | 173.18                     | 6.33 | 0.9200 |

**Table S4** The fitting parameters of thermodynamic model for As(III) adsorption by  
nZVI/MXene@CNTs

| The As(III) initial<br>concentration(mg/L) | $\Delta H^0$ (KJ/mol) | $\Delta S^0$ (J/(mol·K)) | $\Delta G^0$ (kJ/mol) |        |        |
|--------------------------------------------|-----------------------|--------------------------|-----------------------|--------|--------|
|                                            |                       |                          | 15°C                  | 25°C   | 35°C   |
| 25                                         | 94.31                 | 367.65                   | -11.63                | -15.30 | -18.98 |
| 50                                         | 65.66                 | 262.14                   | -9.88                 | -12.50 | -15.12 |
| 75                                         | 38.77                 | 164.53                   | -8.64                 | -10.28 | -11.93 |
| 100                                        | 32.20                 | 139.82                   | -8.09                 | -9.49  | -10.89 |
| 150                                        | 25.92                 | 106.99                   | -4.91                 | -5.98  | -7.05  |
| 200                                        | 13.26                 | 57.44                    | -3.29                 | -3.87  | -4.44  |
| 300                                        | 8.47                  | 33.92                    | -1.30                 | -1.64  | -1.98  |

## References

1. Ye, X.; Ren, G. Adsorption of As(III) from aqueous solution by amidated/oxidized carbon nanotube-polyaniline. *Chin. J. Environme. Eng.* **2019**, *13*, 2798 – 2807.
2. Sherlala, A.I.A.; Raman, A.A.A.; Bello, M.M.; Buthiyappan, A. Adsorption of arsenic using chitosan magnetic graphene oxide nanocomposite. *J. Environ. Manag.* **2019**, *246*, 547–556.
